# Supplementary figures and images for: Anti-PD1 Consolidation in Patients with Hodgkin Lymphoma at High Risk of Relapse after Autologous Stem Cell Transplantation: A Multicenter Real-Life Study
Source: MDPI journal article supplement (doi:10.3390/cancers14235846), 2022-11-27

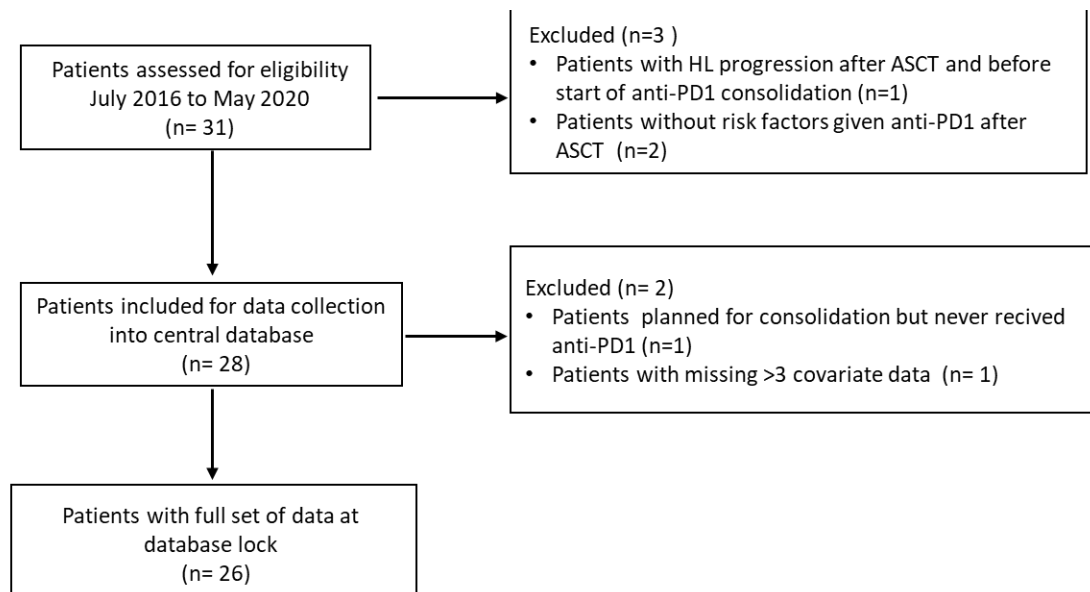

**Figure S1.** Flowchart of the applied inclusion and exclusion criteria.

Supplement: s1 [file s1]
